# Supplementary material for: Trastuzumab emtansine: mechanisms of action and drug resistance
Source: Springer Nature journal article supplement (doi:10.1186/bcr3621), 2014-03-05

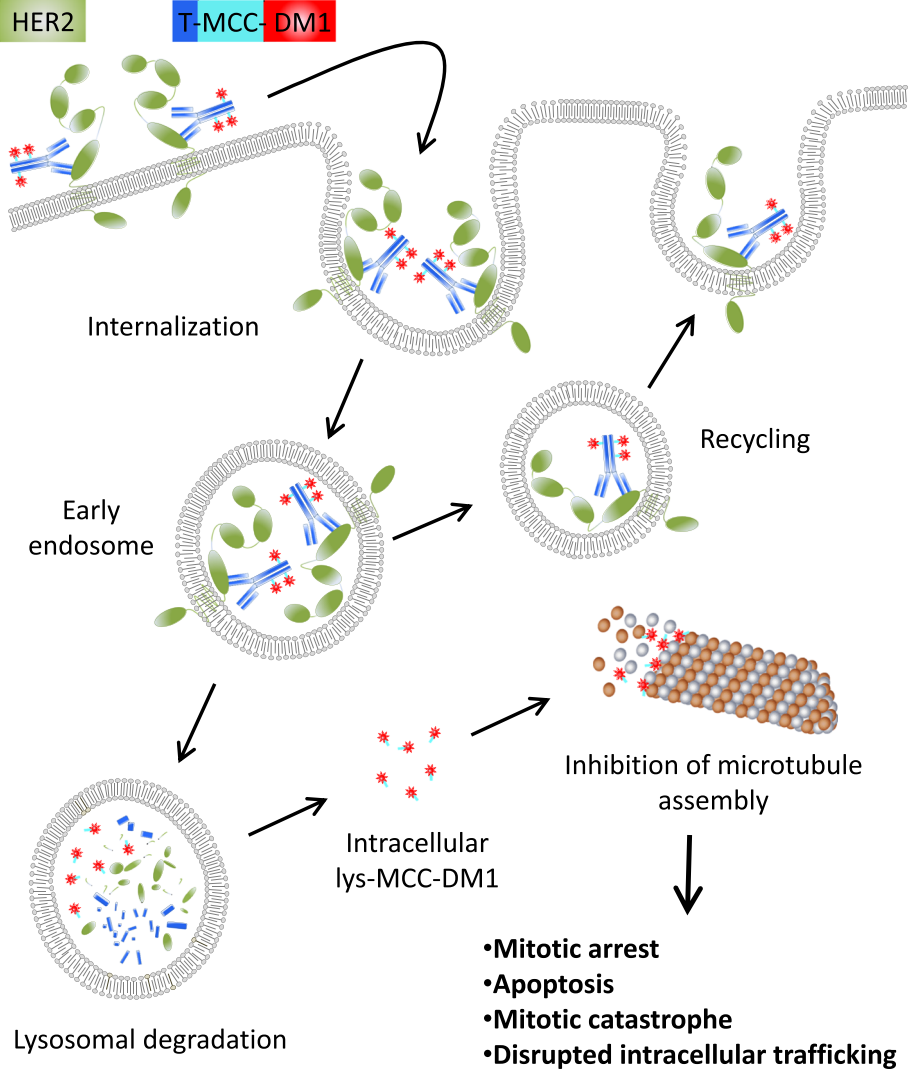

Supplement: 13058_2014_3378_MOESM4_ESM.pdf [file 13058_2014_3378_MOESM4_ESM.pdf]
